# Supplementary material
Source: PubMed Central journal article supplement (PMC3377105)
Supplement: emmm0003-0593-SD2.pdf [file emmm0003-0593-SD2.pdf]

## **Supporting Information For:**

### **Absence of Runx3 expression in normal gastrointestinal epithelium calls into question its tumor suppressor function**

Ditsa Levanon<sup>1</sup>, Yael Bernstein<sup>1</sup>, Varda Negreanu<sup>1</sup>, Karen Rae Bone<sup>1</sup>, Amir Pozner<sup>1</sup>, Raya Eilam<sup>2</sup>, Joseph Lotem<sup>1</sup>, Ori Brenner<sup>2</sup> and Yoram Groner<sup>1,\*</sup>

Departments of <sup>1</sup>Molecular Genetics and <sup>2</sup>Veterinary Resources The Weizmann Institute of Science, Rehovot 76100, Israel.

\*Corresponding author: Yoram Groner, Department of Molecular Genetics The Weizmann Institute of Science, Rehovot 76100, Israel. Phone: 972-8-9343972, FAX: 972-8-9344108, Email: Yoram.groner@weizmann.ac.il

## **Table of Contents**

**Supporting information Text: Evaluation of anti-Runx3 antibodies reliability.**

**References**

**Supporting Figures (Fig. S1 and S2)**

**Supporting Table (Table S1)**

### **Evaluation of anti-Runx3 antibodies reliability.**

In this manuscript we used a variety of methods to show unequivocally the absence of Runx3 expression in GIT epithelium. Among other measures we performed IHC with five different anti-Runx3 Abs on sections from either embryos or adult mice and demonstrated that all five Abs failed to reveal the pronounced Runx3 expression in GIT epithelium reported by Li et al (Li et al, 2002). More recently, the group of Yoshiaki Ito raised several monoclonal anti-Runx3 Abs against the Runx3 protein and identified their recognition regions (Ito et al, 2009).

In an attempt to clarify the immunohistochemical basis for the conflicting results regarding the expression of Runx3 in GIT epithelium, we exchanged anti-Runx3 Abs with Yoshiaki Ito. Our lab provided the poly-G anti-Runx3 Abs (Fig 1 and 2) to Ito's lab and obtained three anti-Runx3 Abs designated R3-8C9, R3-3F12 and R3-1E10 (Ito et al, 2009). Mapping of the epitopes recognized by these Abs as reported by Ito K. et al (Ito et al, 2009) is shown herein in Fig S1A. R3-8C9 recognizes an epitope at the C-terminal end of the protein, whereas the epitope recognized by R3-3F12 and R3-1E10 maps immediately downstream of the RUNT domain (Fig S1A), in a region defined by Ito Y. et al as GIT epithelium "exposed" (Ito, 2008). An additional GIT epithelium "exposed" region (Ito, 2008), is located at the N-terminus of Runx3 (Fig S1A). This region coincides with the region recognized by the two anti-Runx3 Abs, Pep-J and GS, which readily detected Runx3 in GIT leukocytes, but failed to do so in the GIT epithelium (Fig 2A&D).

Using the Poly-G Abs, which we provided, Ito K. et al. (Ito et al, 2009) confirmed our previous observations (Levanon et al, 2001; Levanon & Groner, 2004); and data presented in the manuscript Fig 1 and 2), that Poly-G detect Runx3 in DRG, but not in GIT epithelium (Ito et al, 2009). Using R3-3F12 and R3-8C9 Abs in IHC of GIT sections we found that the GIT leukocytes in each section were clearly stained, whereas the GIT epithelium was not (Fig S1B). Similar results were obtained with Poly-G (Fig S1B). Of note, to avoid the high background staining, that occurs when using mouse primary antibodies on mouse tissues, the analysis presented in Fig S1B&C, was conducted with the MOM kit (Vector laboratories Burlingame, CA, USA), designed specifically to use with mouse primary Abs on murine tissues. This protocol was particularly important because GIT epithelial cells are notorious for their high degree of nonspecific antibody binding.

It was previously reported by Ito K. et al (Ito et al, 2009) that of the three monoclonal anti-Runx3 Abs (R3-1E10, R3-3F12 and R3-8C9) R3-1E10 displayed an inverse reactivity pattern compared to Poly-G, namely, it detected Runx3 in GIT epithelium, but not in the DRG (Ito et al, 2009). This was a peculiar finding since Runx3 expression in DRG is considered the undisputed golden standard of the Runx3 expression-signature (Inoue et al, 2002; Kramer et al, 2006; Levanon et al, 2002; Levanon et al, 2001; Li et al, 2002; Marmigere & Ernfors, 2007). To explain the

unusual activity of R3-1E10 Abs the authors postulated that in GIT epithelium the C-terminal region of Runx3 is sequestered in an epithelial-specific manner (Ito et al, 2009; Ito, 2008). Two uncommon mechanisms were suggested. The first postulated that the GIT epithelial C-terminal region of Runx3 undergoes a conformational change due to an epithelial-specific modification of the protein. The second suggested that an unidentified epithelial protein was specifically bound to the C-terminal region and masked certain epitopes (Ito et al, 2009; Ito, 2008). Based on these assumptions, neither of which were supported by any experimental evidence, the authors concluded that the reason Poly-G failed to detect Runx3 in GIT epithelium is because it was raised against the C-terminal region of Runx3, which is inaccessible in epithelial cells (Ito et al, 2009).

Using R3-1E10 Abs on sections of either DRG or GIT tissues, we confirmed the finding of Ito et al (Ito et al, 2009) that R3-1E10 Abs did not detect Runx3 in DRG (Fig S1C), but we further found that R3-1E10 neither reacted with GIT epithelial cells nor with GIT-embedded leukocytes (Fig S1C). Of note, the inability of R3-1E10 to detect Runx3 in DRG and/or in leukocytes, the two major and undisputed sites of Runx3 expression, disqualifies it as a valid anti-Runx3 Ab. Supporting this conclusion are the findings that Mono-G Abs, which were raised against the same GIT epithelium “exposed” region (Fig S1A) readily reacted with Runx3 in DRG, but not in GIT epithelium (Fig S1C). Hence, results attained using R3-1E10 should be interpreted cautiously, in particular its reaction with GIT epithelium (Ito et al, 2009). Together, the combined outcome of the IHC experiments (Fig S1B-C) and the comprehensive evidences for the absence of Runx3 in GIT epithelium described in the manuscript, exclude the possibility of a GIT epithelium-specific sequestering of Runx3 (Ito et al, 2009; Ito, 2008) and demonstrate that R3-1E10 is not a valid anti-Runx3 Ab.

In all, more than seven anti-Runx3 Abs were tested, either in the present manuscript or by Ito et al (Ito et al, 2009); of these, only R3-1E10 did not detect Runx3 in DRG and leukocytes. Therefore, as noted before, it is unfortunate and scientifically unsound that of all available anti-Runx3 Abs, R3-1E10 was the one recently used to detect Runx3 expression in GIT epithelium (Ito et al, 2008) without a proper disclosure of any information regarding its unique properties. Given that GIT

epithelial cells are notorious for their high degree of nonspecific antibody binding, it is important to note that of the seven anti-Runx3 Abs raised by different laboratories not a single one produced a reliable signal when reacted with GIT epithelium (Fig 2 and Fig S1). This finding poses a serious challenge to published data documenting Runx3 expression in GIT epithelium that was solely based on IHC. The data presented herein which using various measures demonstrate that Runx3 expression is undetectable in GIT epithelium strongly support this conclusion.

### **Supporting Information References**

Inoue K, Ozaki S, Shiga T, Ito K, Masuda T, Okado N, Iseda T, Kawaguchi S, Ogawa M, Bae SC et al (2002) Runx3 controls the axonal projection of proprioceptive dorsal root ganglion neurons. *Nat Neurosci* 5: 946-954

Ito K, Inoue KI, Bae SC, Ito Y (2009) Runx3 expression in gastrointestinal tract epithelium: resolving the controversy. *Oncogene* 28: 1379-1384

Ito K, Lim AC, Salto-Tellez M, Motoda L, Osato M, Chuang LS, Lee CW, Voon DC, Koo JK, Wang H et al (2008) RUNX3 attenuates beta-catenin/T cell factors in intestinal tumorigenesis. *Cancer Cell* 14: 226-237

Ito Y (2008) RUNX genes in development and cancer: regulation of viral gene expression and the discovery of RUNX family genes. *Adv Cancer Res* 99: 33-76

Kramer I, Sigrist M, de Nooij JC, Taniuchi I, Jessell TM, Arber S (2006) A role for Runx transcription factor signaling in dorsal root ganglion sensory neuron diversification. *Neuron* 49: 379-393

Levanon D, Bettoun D, Harris-Cerruti C, Woolf E, Negreanu V, Eilam R, Bernstein Y, Goldenberg D, Xiao C, Fliegau M et al (2002) The Runx3 transcription factor regulates development and survival of TrkC dorsal root ganglia neurons. *Embo J* 21: 3454-3463

Levanon D, Brenner O, Negreanu V, Bettoun D, Woolf E, Eilam R, Lotem J, Gat U, Otto F, Speck N et al (2001) Spatial and temporal expression pattern of Runx3 (Aml2) and Runx1 (Aml1) indicates non-redundant functions during mouse embryogenesis. *Mech Dev* 109: 413-417

Levanon D, Groner Y (2004) Structure and regulated expression of mammalian RUNX genes. *Oncogene* 23: 4211-4219

Li QL, Ito K, Sakakura C, Fukamachi H, Inoue K, Chi XZ, Lee KY, Nomura S, Lee CW, Han SB et al (2002) Causal relationship between the loss of RUNX3 expression and gastric cancer. *Cell* 109: 113-124

Marmigere F, Ernfors P (2007) Specification and connectivity of neuronal subtypes in the sensory lineage. *Nat Rev Neurosci* 8: 114-127

## **Supporting Information Figure 1**

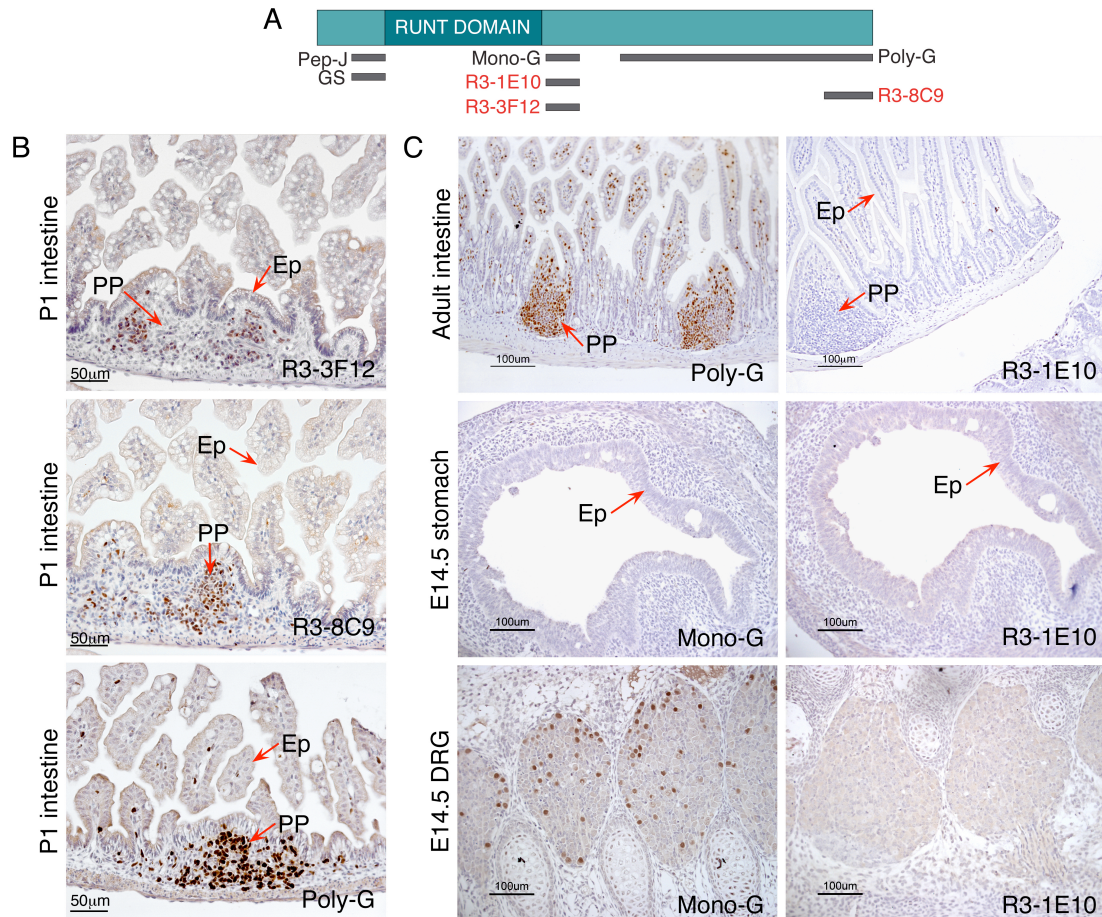

**Figure S1. Rigorous evaluation of anti-Runx3 Abs demonstrates that R3-1E10 is an unreliable reagent for detection of Runx3 expression.**

**A.** Scheme of Runx3 protein structure indicating the positions of the peptides used for generation of the Abs (Poly-G, Mono-G, Pep-J and GS), or the epitopes recognized by the anti-Runx3 Abs (R3-8C9, R3-3F12 and R3-1E10).

**B.** *Bona fide* anti-Runx3 Abs raised either by Ito's group (R3-3F12 and R3-8C9) or by us (Poly-G) failed to detect Runx3 in GIT epithelium. Transverse section of one-day-old (P1) intestine from WT mice immunostained either by R3-3F12, R3-8C9 or Poly-G Abs using the MOM kit (Vector laboratories). Runx3 was detected in GIT leukocytes

located in the Peyer's patches (PP), but was not detected in the surrounding GIT epithelium (Ep).

C. The R3-1E10 Ab does not have Anti-Runx3 specificity. Transverse section of adult intestine and E14.5 stomach or DRG immunostained with Poly-G, Mono-G or R3-1E10 Abs. In adult intestine (top panels), Poly-G detected Runx3 in Peyer's patches (PP) leukocytes and GIT-embedded IEL, whereas R3-1E10 did not. Neither Poly-G nor R3-1E10 detected Runx3 in the intestinal epithelium. The stomach of E14.5 embryos (middle panels) is practically devoid of leukocytes. Neither Mono-G nor R3-1E10 detected Runx3 in the stomach epithelium. Of note, these two monoclonal anti-Runx3 Abs (Mono-G and R3-1E10) were raised against similar Runx3 region (A). In E14.5 DRG (bottom panels) Runx3, which is highly expressed in TrkC neurons (Inoue et al, 2002; Kramer et al, 2006; Levanon et al, 2002; Levanon et al, 2001; Li et al, 2002; Marmigere & Ernfors, 2007), is readily detected by Mono-G, but not by R3-1E10.

### Supporting Information Figure 2

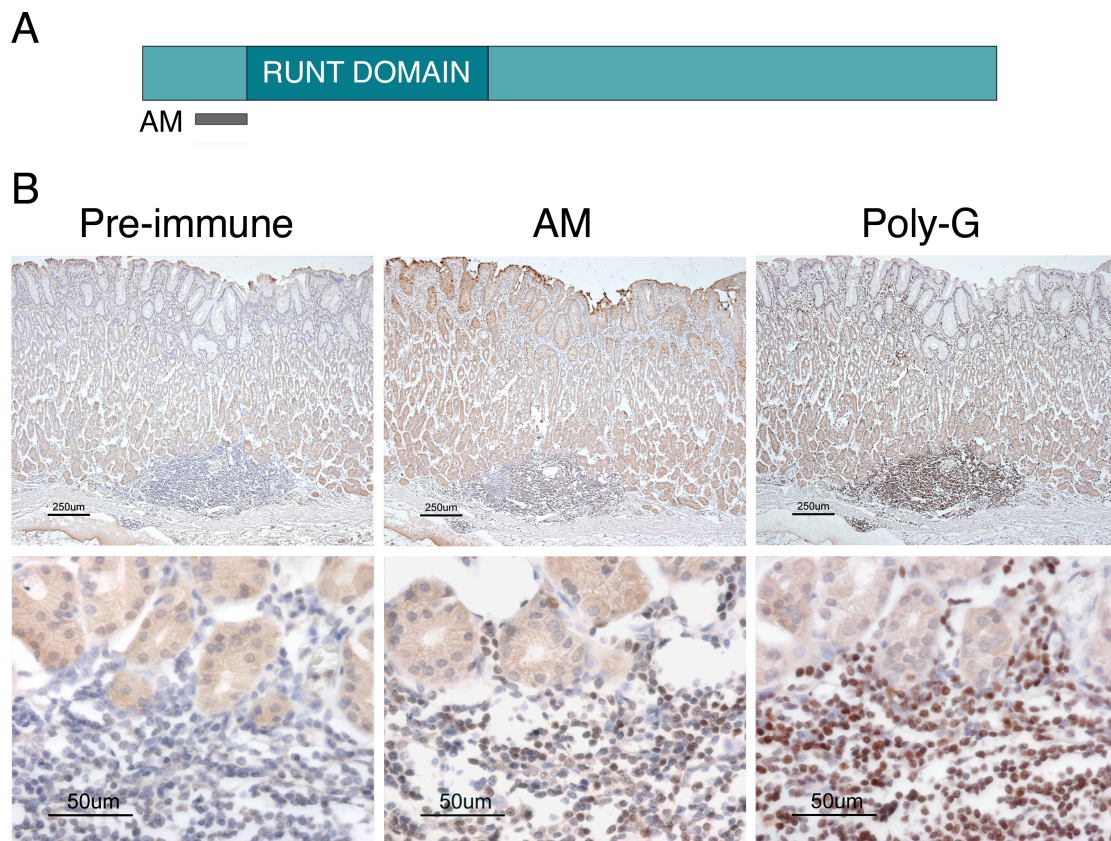

**Figure S2. Anti-RUNX3 antibodies detect RUNX3 protein in leukocytes but not in epithelium of human stomach.**

**A.** Scheme of RUNX3 protein structure indicating the position of the peptide used for generation of the Active Motif (AM) anti RUNX3 antibody. The position of Poly-G is shown in Fig S1.

**B.** Human cardiopyloric stomach sections (Upper panels x4, lower panels x40) were reacted with pre-immune serum (left panels), with AM Ab (middle panels), or with Poly-G anti RUNX3/Runx3 Ab. The pre-immune serum as well as the AM and Poly-G Abs reveal the characteristic high background staining in the epithelium. Specific staining of leukocytes is detected in the AM and Poly-G but not the pre-immune panels.

## **Supporting Information Table 1**

---

**Table S1. List of publications addressing associations of Runx3 loss with tumor development in wide spectrum of cancers**

The list was compiled from PubMed using “Runx3” and “Cancer” as search terms. The original retrieved list of 333 articles was reduced to the 286 articles listed below following evaluation for relevancy. The list is up-to-date as of May 8 2011

---

Ahlquist T, Lind GE, Costa VL, Meling GI, Vatn M, Hoff GS, Rognum TO, Skotheim RI, Thiss-Evensen E, Lothe RA (2008) Gene methylation profiles of normal mucosa, and benign and malignant colorectal tumors identify early onset markers. *Mol Cancer* 7: 94

Al-Moundhri MS, Al-Nabhani M, Tarantini L, Baccarelli A, Rusiecki JA (2010) The prognostic significance of whole blood global and specific DNA methylation levels in gastric adenocarcinoma. *PLoS One* 5: e15585

Anglin I, Passaniti A (2004) Runx protein signaling in human cancers. *Cancer Treat Res* 119: 189-215

Araki K, Osaki M, Nagahama Y, Hiramatsu T, Nakamura H, Ohgi S, Ito H (2005) Expression of RUNX3 protein in human lung adenocarcinoma: implications for tumor progression and prognosis. *Cancer Sci* 96: 227-231

Arnold CN, Sosnowski A, Schmitt-Graff A, Arnold R, Blum HE (2007) Analysis of molecular pathways in sporadic neuroendocrine tumors of the gastro-entero-pancreatic system. *Int J Cancer* 120: 2157-2164

Baba Y, Noshio K, Shima K, Goessling W, Chan AT, Ng K, Chan JA, Giovannucci EL, Fuchs CS, Ogino S (2010) PTGER2 overexpression in colorectal cancer is associated with microsatellite instability, independent of CpG island methylator phenotype. *Cancer Epidemiol Biomarkers Prev* 19: 822-831

- Bae SC, Choi JK (2004) Tumor suppressor activity of RUNX3. *Oncogene* 23: 4336-4340
- Bae SC, Lee YH (2006) Phosphorylation, acetylation and ubiquitination: the molecular basis of RUNX regulation. *Gene* 366: 58-66
- Bai WD, Zhang R, Meng YL, Cao YX, Wang T, Zhao J, Yang AG (2009) [Expression and localization of adenovirus-mediated transcriptional factor Runx3 in malignant glioblastoma cells]. *Xi Bao Yu Fen Zi Mian Yi Xue Za Zhi* 25: 866-869
- Balmain A (2002) Cancer: new-age tumour suppressors. *Nature* 417: 235-237
- Bernal C, Aguayo F, Villarroel C, Vargas M, Diaz I, Ossandon FJ, Santibanez E, Palma M, Aravena E, Barrientos C et al (2008) Reprimo as a potential biomarker for early detection in gastric cancer. *Clin Cancer Res* 14: 6264-6269
- Cameron ER, Neil JC (2004) The Runx genes: lineage-specific oncogenes and tumor suppressors. *Oncogene* 23: 4308-4314
- Carvalho R, Milne AN, Polak M, Corver WE, Offerhaus GJ, Weterman MA (2005) Exclusion of RUNX3 as a tumour-suppressor gene in early-onset gastric carcinomas. *Oncogene* 24: 8252-8258
- Carvalho R, Milne AN, van Rees BP, Caspers E, Cirnes L, Figueiredo C, Offerhaus GJ, Weterman MA (2004) Early-onset gastric carcinomas display molecular characteristics distinct from gastric carcinomas occurring at a later age. *J Pathol* 204: 75-83
- Castro M, Grau L, Puerta P, Gimenez L, Venditti J, Quadrelli S, Sanchez-Carbayo M (2010) Multiplexed methylation profiles of tumor suppressor genes and clinical outcome in lung cancer. *J Transl Med* 8: 86
- Cha EJ, Oh BC, Wee HJ, Chi XZ, Goh YM, Lee KS, Ito Y, Bae SC (2008) E1A physically interacts with RUNX3 and inhibits its transactivation activity. *J Cell Biochem* 105: 236-244
- Chang TL, Ito K, Ko TK, Liu Q, Salto-Tellez M, Yeoh KG, Fukamachi H, Ito Y (2010) Claudin-1 has tumor suppressive activity and is a direct target of RUNX3 in gastric epithelial cells. *Gastroenterology* 138: 255-265 e251-253
- Chen PC, Kuraguchi M, Velasquez J, Wang Y, Yang K, Edwards R, Gillen D, Edelmann W, Kucherlapati R, Lipkin SM (2008) Novel roles for MLH3 deficiency and TLE6-like amplification in DNA mismatch repair-deficient gastrointestinal tumorigenesis and progression. *PLoS Genet* 4: e1000092
- Chen W, Gao N, Shen Y, Cen JN (2010) Hypermethylation downregulates Runx3 gene expression and its restoration suppresses gastric epithelial cell growth by inducing p27 and caspase3 in human gastric cancer. *J Gastroenterol Hepatol* 25: 823-831
- Chen W, Salto-Tellez M, Palanisamy N, Ganesan K, Hou Q, Tan LK, Sii LH, Ito K, Tan B, Wu J et al (2007) Targets of genome copy number reduction in primary breast cancers identified by integrative genomics. *Genes Chromosomes Cancer* 46: 288-301
- Chen Y, Wei X, Guo C, Jin H, Han Z, Han Y, Qiao T, Wu K, Fan D (2010) Runx3 suppresses gastric cancer metastasis through inactivation of MM9 by up-regulation of TIMP-1. *Int J Cancer* advance online publication 2 December 2010; doi:10.1002/ijc.25831



- Cheng AS, Culhane AC, Chan MW, Venkataramu CR, Ehrich M, Nasir A, Rodriguez BA, Liu J, Yan PS, Quackenbush J et al (2008) Epithelial progeny of estrogen-exposed breast progenitor cells display a cancer-like methylome. *Cancer Res* 68: 1786-1796
- Cheng ZD, Hu SL, Sun YB, Xu WP, Shen G, Kong XY (2010) Promoter methylation of CHFR gene in gastric carcinoma tissues detected using two methods. *Chin J Cancer* 29: 163-166
- Chi XZ, Kim J, Lee YH, Lee JW, Lee KS, Wee H, Kim WJ, Park WY, Oh BC, Stein GS et al (2009) Runt-related transcription factor RUNX3 is a target of MDM2-mediated ubiquitination. *Cancer Res* 69: 8111-8119
- Chi XZ, Yang JO, Lee KY, Ito K, Sakakura C, Li QL, Kim HR, Cha EJ, Lee YH, Kaneda A et al (2005) RUNX3 suppresses gastric epithelial cell growth by inducing p21(WAF1/Cip1) expression in cooperation with transforming growth factor {beta}-activated SMAD. *Mol Cell Biol* 25: 8097-8107
- Cho NY, Kim BH, Choi M, Yoo EJ, Moon KC, Cho YM, Kim D, Kang GH (2007) Hypermethylation of CpG island loci and hypomethylation of LINE-1 and Alu repeats in prostate adenocarcinoma and their relationship to clinicopathological features. *J Pathol* 211: 269-277
- Chuang LS, Ito Y (2010) RUNX3 is multifunctional in carcinogenesis of multiple solid tumors. *Oncogene* 29: 2605-2615
- Coffman JA (2003) Runx transcription factors and the developmental balance between cell proliferation and differentiation. *Cell Biol Int* 27: 315-324
- Cohen MM, Jr. (2001) RUNX genes, neoplasia, and cleidocranial dysplasia. *Am J Med Genet* 104: 185-188
- Cohen MM, Jr. (2003) Molecular dimensions of gastrointestinal tumors: some thoughts for digestion. *Am J Med Genet A* 122A: 303-314
- Cohen Y, Merhavi-Shoham E, Avraham RB, Frenkel S, Pe'er J, Goldenberg-Cohen N (2008) Hypermethylation of CpG island loci of multiple tumor suppressor genes in retinoblastoma. *Exp Eye Res* 86: 201-206
- Dachrut S, Banthaisong S, Sripa M, Paeyao A, Ho C, Lee SA, Kosinski C, Patil MA, Zhang J, Chen X et al (2009) DNA copy-number loss on 1p36.1 harboring RUNX3 with promoter hypermethylation and associated loss of RUNX3 expression in liver fluke-associated intrahepatic cholangiocarcinoma. *Asian Pac J Cancer Prev* 10: 575-582
- de Freitas Cordeiro-Silva M, Oliveira ZF, de Podesta JR, Gouvea SA, Von Zeidler SV, Louro ID (2011) Methylation analysis of cancer-related genes in non-neoplastic cells from patients with oral squamous cell carcinoma. *Mol Biol Rep* advance online publication 5 March 2011; doi:10.1007/s11033-011-0698-1
- Deng T, Zhang Y (2009) Possible involvement of activation of P53/P21 and demethylation of RUNX 3 in the cytotoxicity against Lovo cells induced by 5-Aza-2'-deoxycytidine. *Life Sci* 84: 311-320
- Deng T, Zhang Y (2009) 5-Aza-2'-deoxycytidine reactivates expression of RUNX3 by

deletion of DNA methyltransferases leading to caspase independent apoptosis in colorectal cancer Lovo cells. *Biomed Pharmacother* 63: 492-500

Dhillon VS, Shahid M, Husain SA (2004) CpG methylation of the FHIT, FANCF, cyclin-D2, BRCA2 and RUNX3 genes in Granulosa cell tumors (GCTs) of ovarian origin. *Mol Cancer* 3: 33

English DR, Young JP, Simpson JA, Jenkins MA, Southey MC, Walsh MD, Buchanan DD, Barker MA, Haydon AM, Royce SG et al (2008) Ethnicity and risk for colorectal cancers showing somatic BRAF V600E mutation or CpG island methylator phenotype. *Cancer Epidemiol Biomarkers Prev* 17: 1774-1780

Feng XZ, He XS, Zhuang YZ, Luo Q, Jiang JH, Yang S, Tang XF, Liu JL, Chen T (2008) Investigation of transcriptional gene silencing and mechanism induced by shRNAs targeted to RUNX3 in vitro. *World J Gastroenterol* 14: 3006-3014

Ferracin M, Gafa R, Miotto E, Veronese A, Pultrone C, Sabbioni S, Lanza G, Negrini M (2008) The methylator phenotype in microsatellite stable colorectal cancers is characterized by a distinct gene expression profile. *J Pathol* 214: 594-602

Friedrich MJ, Rad R, Langer R, Voland P, Hoefler H, Schmid RM, Prinz C, Gerhard M (2006) Lack of RUNX3 regulation in human gastric cancer. *J Pathol* 210: 141-146

Fu Y, Chang AC, Fournier M, Chang L, Niessen K, Karsan A (2011) RUNX3 maintains the mesenchymal phenotype after termination of the notch signal. *J Biol Chem* 286: 11803-11813

Fujii S, Ito K, Ito Y, Ochiai A (2008) Enhancer of zeste homologue 2 (EZH2) down-regulates RUNX3 by increasing histone H3 methylation. *J Biol Chem* 283: 17324-17332

Fujii S, Tokita K, Wada N, Ito K, Yamauchi C, Ito Y, Ochiai A (2011) MEK-ERK pathway regulates EZH2 overexpression in association with aggressive breast cancer subtypes. *Oncogene* advance online publication 18 April 2011; doi: 10.1038/onc.2011.118

Fujikawa T, Shiraha H, Ueda N, Takaoka N, Nakanishi Y, Matsuo N, Tanaka S, Nishina S, Suzuki M, Takaki A et al (2007) Des-gamma-carboxyl prothrombin-promoted vascular endothelial cell proliferation and migration. *J Biol Chem* 282: 8741-8748

Fukamachi H (2006) Runx3 controls growth and differentiation of gastric epithelial cells in mammals. *Dev Growth Differ* 48: 1-13

Fukamachi H, Ito K (2004) Growth regulation of gastric epithelial cells by Runx3. *Oncogene* 23: 4330-4335

Fukamachi H, Ito K, Ito Y (2004) Runx3<sup>-/-</sup> gastric epithelial cells differentiate into intestinal type cells. *Biochem Biophys Res Commun* 321: 58-64

Fukamachi H, Mimata A, Tanaka I, Ito K, Ito Y, Yuasa Y (2008) In vitro differentiation of Runx3<sup>-/-</sup> p53<sup>-/-</sup> gastric epithelial cells into intestinal type cells. *Cancer Sci* 99: 671-676

Gao F, Huang C, Lin M, Wang Z, Shen J, Zhang H, Jiang L, Chen Q (2009) Frequent inactivation of RUNX3 by promoter hypermethylation and protein mislocalization in oral squamous cell carcinomas. *J Cancer Res Clin Oncol* 135: 739-747

Gao J, Chen Y, Wu KC, Liu J, Zhao YQ, Pan YL, Du R, Zheng GR, Xiong YM, Xu HL et al (2010) RUNX3 directly interacts with intracellular domain of Notch1 and suppresses Notch signaling in hepatocellular carcinoma cells. *Exp Cell Res* 316: 149-157

Gao N, Chen WC, Cen JN (2008) [Relationship between Runx3 gene expression and its DNA methylation in gastric cancer]. *Zhonghua Zhong Liu Za Zhi* 30: 361-364

Gargano G, Calcara D, Corsale S, Agnese V, Intrivici C, Fulfaro F, Pantuso G, Cajozzo M, Morello V, Tomasino RM et al (2007) Aberrant methylation within RUNX3 CpG island associated with the nuclear and mitochondrial microsatellite instability in sporadic gastric cancers. Results of a GOIM (Gruppo Oncologico dell'Italia Meridionale) prospective study. *Ann Oncol* 18 Suppl 6: vi103-109

Garrity-Park M, Loftus EV, Jr., Sandborn WJ, Smyrk TC (2011) Myeloperoxidase immunohistochemistry as a measure of disease activity in ulcerative colitis: Association with ulcerative colitis-colorectal cancer, tumor necrosis factor polymorphism and RUNX3 methylation. *Inflamm Bowel Dis* advance online publication 18 March 2011; doi: 10.1002/ibd.21681

Garrity-Park MM, Loftus EV, Jr., Sandborn WJ, Bryant SC, Smyrk TC (2010) Methylation status of genes in non-neoplastic mucosa from patients with ulcerative colitis-associated colorectal cancer. *Am J Gastroenterol* 105: 1610-1619

Ge MH, Ling ZQ, Tan Z, Chen C, Zheng CM, Xu JJ, Zhu X (2010) [RUNX3 expression and its methylation of 5'-CpG island in salivary gland adenoid cystic carcinoma cell lines ACC-2, ACC-3 and ACC-M.]. *Zhonghua Yi Xue Za Zhi* 90: 3426-3430

Goel A, Arnold CN, Tassone P, Chang DK, Niedzwiecki D, Dowell JM, Wasserman L, Compton C, Mayer RJ, Bertagnolli MM et al (2004) Epigenetic inactivation of RUNX3 in microsatellite unstable sporadic colon cancers. *Int J Cancer* 112: 754-759

Goel A, Nagasaka T, Arnold CN, Inoue T, Hamilton C, Niedzwiecki D, Compton C, Mayer RJ, Goldberg R, Bertagnolli MM et al (2007) The CpG island methylator phenotype and chromosomal instability are inversely correlated in sporadic colorectal cancer. *Gastroenterology* 132: 127-138

Goel A, Xicola RM, Nguyen TP, Doyle BJ, Sohn VR, Bandipalliam P, Rozek LS, Reyes J, Cordero C, Balaguer F et al (2010) Aberrant DNA methylation in hereditary nonpolyposis colorectal cancer without mismatch repair deficiency. *Gastroenterology* 138: 1854-1862

Goh YM, Cinghu S, Hong ET, Lee YS, Kim JH, Jang JW, Li YH, Chi XZ, Lee KS, Wee H et al (2010) Src kinase phosphorylates RUNX3 at tyrosine residues and localizes the protein in the cytoplasm. *J Biol Chem* 285: 10122-10129

Griffiths EA, Gore SD, Hooker C, McDevitt MA, Karp JE, Smith BD, Mohammad HP, Ye Y, Herman JG, Carraway HE (2010) Acute myeloid leukemia is characterized by Wnt pathway inhibitor promoter hypermethylation. *Leuk Lymphoma* 51: 1711-1719

Guo C, Ding J, Yao L, Sun L, Lin T, Song Y, Fan D (2005) Tumor suppressor gene Runx3 sensitizes gastric cancer cells to chemotherapeutic drugs by downregulating Bcl-2, MDR-1 and MRP-1. *Int J Cancer* 116: 155-160

- Guo WH, Weng LQ, Ito K, Chen LF, Nakanishi H, Tatematsu M, Ito Y (2002) Inhibition of growth of mouse gastric cancer cells by Runx3, a novel tumor suppressor. *Oncogene* 21: 8351-8355
- Gutierrez-Gonzalez L, Wright NA (2008) Biology of intestinal metaplasia in 2008: more than a simple phenotypic alteration. *Dig Liver Dis* 40: 510-522
- Hasegawa K, Yazumi S, Wada M, Sakurai T, Kida M, Yamauchi J, Hisatsune H, Tada S, Ida H, Nakase Y et al (2007) Restoration of RUNX3 enhances transforming growth factor-beta-dependent p21 expression in a biliary tract cancer cell line. *Cancer Sci* 98: 838-843
- He JF, Ge MH, Zhu X, Chen C, Tan Z, Li YN, Gu ZY (2008) Expression of RUNX3 in salivary adenoid cystic carcinoma: implications for tumor progression and prognosis. *Cancer Sci* 99: 1334-1340
- Hibi K, Nakao A (2006) Highly-methylated colorectal cancers show poorly-differentiated phenotype. *Anticancer Res* 26: 4263-4266
- Hibi K, Nakao A (2006) Lymph node metastasis is infrequent in patients with highly-methylated colorectal cancer. *Anticancer Res* 26: 55-58
- Hiraki M, Kitajima Y, Nakafusa Y, Nakamura J, Hashiguchi K, Sumi K, Noshiro H, Miyazaki K (2010) CpG island methylation of BNIP3 predicts resistance against S-1/CPT-11 combined therapy in colorectal cancer patients. *Oncol Rep* 23: 191-197
- Hiraki M, Kitajima Y, Sato S, Mitsuno M, Koga Y, Nakamura J, Hashiguchi K, Noshiro H, Miyazaki K (2010) Aberrant gene methylation in the lymph nodes provides a possible marker for diagnosing micrometastasis in gastric cancer. *Ann Surg Oncol* 17: 1177-1186
- Hiraki M, Kitajima Y, Sato S, Nakamura J, Hashiguchi K, Noshiro H, Miyazaki K (2010) Aberrant gene methylation in the peritoneal fluid is a risk factor predicting peritoneal recurrence in gastric cancer. *World J Gastroenterol* 16: 330-338
- Hiramatsu T, Osaki M, Ito Y, Tanji Y, Tokuyasu N, Ito H (2005) Expression of RUNX3 protein in human esophageal mucosa and squamous cell carcinoma. *Pathobiology* 72: 316-324
- Hishida A, Matsuo K, Goto Y, Hamajima N (2010) Genetic predisposition to Helicobacter pylori-induced gastric precancerous conditions. *World J Gastrointest Oncol* 2: 369-379
- Hishida A, Matsuo K, Goto Y, Mitsuda Y, Naito M, Wakai K, Tajima K, Hamajima N (2009) Significant association of RUNX3 T/A polymorphism at intron 3 (rs760805) with the risk of gastric atrophy in Helicobacter pylori seropositive Japanese. *J Gastroenterol* 44: 1165-1171
- Homma N, Tamura G, Honda T, Matsumoto Y, Nishizuka S, Kawata S, Motoyama T (2006) Spreading of methylation within RUNX3 CpG island in gastric cancer. *Cancer Sci* 97: 51-56
- Hsu PI, Hsieh HL, Lee J, Lin LF, Chen HC, Lu PJ, Hsiao M (2009) Loss of RUNX3 expression correlates with differentiation, nodal metastasis, and poor prognosis of gastric cancer. *Ann Surg Oncol* 16: 1686-1694
- Hu SL, Huang DB, Sun YB, Wu L, Xu WP, Yin S, Chen J, Jiang XD, Shen G (2010) Pathobiologic implications of methylation and expression status of Runx3 and CHFR genes in gastric cancer. *Med Oncol advance online publication* 19 March 2010; 10.1007/s12032-

Hu SL, Kong XY, Cheng ZD, Sun YB, Shen G, Xu WP, Wu L, Xu XC, Jiang XD, Huang DB (2010) Promoter methylation of p16, Runx3, DAPK and CHFR genes is frequent in gastric carcinoma. *Tumori* 96: 726-733

Huang C, Ida H, Ito K, Zhang H, Ito Y (2007) Contribution of reactivated RUNX3 to inhibition of gastric cancer cell growth following suberoylanilide hydroxamic acid (vorinostat) treatment. *Biochem Pharmacol* 73: 990-1000

Hwang KT, Han W, Bae JY, Hwang SE, Shin HJ, Lee JE, Kim SW, Min HJ, Noh DY (2007) Downregulation of the RUNX3 gene by promoter hypermethylation and hemizygous deletion in breast cancer. *J Korean Med Sci* 22 Suppl: S24-31

Ibrahim AE, Arends MJ, Silva AL, Wyllie AH, Greger L, Ito Y, Vowler SL, Huang TH, Tavaré S, Murrell A et al (2010) Sequential DNA methylation changes are associated with DNMT3B overexpression in colorectal neoplastic progression. *Gut* 60: 499-508

Imamura Y, Hibi K, Koike M, Fujiwara M, Kodera Y, Ito K, Nakao A (2005) RUNX3 promoter region is specifically methylated in poorly-differentiated colorectal cancer. *Anticancer Res* 25: 2627-2630

Ito K (2011) RUNX3 in oncogenic and anti-oncogenic signaling in gastrointestinal cancers. *J Cell Biochem* 112: 1243-1249

Ito K, Chuang LS, Ito T, Chang TL, Fukamachi H, Salto-Tellez M, Ito Y (2011) Loss of Runx3 is a key event in inducing precancerous state of the stomach. *Gastroenterology* 140: 1536-1546.e1538

Ito K, Lim AC, Salto-Tellez M, Motoda L, Osato M, Chuang LS, Lee CW, Voon DC, Koo JK, Wang H et al (2008) RUNX3 attenuates beta-catenin/T cell factors in intestinal tumorigenesis. *Cancer Cell* 14: 226-237

Ito K, Liu Q, Salto-Tellez M, Yano T, Tada K, Ida H, Huang C, Shah N, Inoue M, Rajnakova A et al (2005) RUNX3, a novel tumor suppressor, is frequently inactivated in gastric cancer by protein mislocalization. *Cancer Res* 65: 7743-7750

Ito Y (2004) Oncogenic potential of the RUNX gene family: 'overview'. *Oncogene* 23: 4198-4208

Ito Y (2008) RUNX genes in development and cancer: regulation of viral gene expression and the discovery of RUNX family genes. *Adv Cancer Res* 99: 33-76

Ito Y, Miyazono K (2003) RUNX transcription factors as key targets of TGF-beta superfamily signaling. *Curr Opin Genet Dev* 13: 43-47

Ito Y, Osato M, Ito K (2003) RUNX and cancer. *Ann Acad Med Singapore* 32: S6-7

Iwatani K, Fujimoto T, Ito T (2010) Cyclin D1 blocks the anti-proliferative function of RUNX3 by interfering with RUNX3-p300 interaction. *Biochem Biophys Res Commun* 400: 426-431

Jiang Y, Tong D, Lou G, Zhang Y, Geng J (2008) Expression of RUNX3 gene, methylation status and clinicopathological significance in breast cancer and breast cancer cell lines. *Pathobiology* 75: 244-251

Jin M, Kawakami K, Fukui Y, Tsukioka S, Oda M, Watanabe G, Takechi T, Oka T, Minamoto T (2009) Different histological types of non-small cell lung cancer have distinct folate and DNA methylation levels. *Cancer Sci* 100: 2325-2330

Jin YH, Jeon EJ, Li QL, Lee YH, Choi JK, Kim WJ, Lee KY, Bae SC (2004) Transforming growth factor-beta stimulates p300-dependent RUNX3 acetylation, which inhibits ubiquitination-mediated degradation. *J Biol Chem* 279: 29409-29417

Jin Z, Cheng Y, Gu W, Zheng Y, Sato F, Mori Y, Olaru AV, Paun BC, Yang J, Kan T et al (2009) A multicenter, double-blinded validation study of methylation biomarkers for progression prediction in Barrett's esophagus. *Cancer Res* 69: 4112-4115

Jo H, Kang S, Kim JW, Kang GH, Park NH, Song YS, Park SY, Kang SB, Lee HP (2007) Hypermethylation of the COX-2 gene is a potential prognostic marker for cervical cancer. *J Obstet Gynaecol Res* 33: 236-241

Jover R, Nguyen TP, Perez-Carbonell L, Zapater P, Paya A, Alenda C, Rojas E, Cubiella J, Balaguer F, Morillas JD et al (2010) 5-Fluorouracil Adjuvant Chemotherapy Does Not Increase Survival in Patients With CpG Island Methylator Phenotype Colorectal Cancer. *Gastroenterology* 140: 1174-1181

Jung SH, Chung WC, Lee KM, Paik CN, Jung JH, Lee MK, Lee YK, Chung IS (2010) Risk factors in malignant transformation of gastric epithelial neoplasia categorized by the revised Vienna classification: endoscopic, pathological, and immunophenotypic features. *Gastric Cancer* 13: 123-130

Jung Y, Park J, Kim TY, Park JH, Jong HS, Im SA, Robertson KD, Bang YJ (2007) Potential advantages of DNA methyltransferase 1 (DNMT1)-targeted inhibition for cancer therapy. *J Mol Med* 85: 1137-1148

Kang GH, Lee S, Lee HJ, Hwang KS (2004) Aberrant CpG island hypermethylation of multiple genes in prostate cancer and prostatic intraepithelial neoplasia. *J Pathol* 202: 233-240

Kang S, Kim JW, Kang GH, Park NH, Song YS, Kang SB, Lee HP (2005) Polymorphism in folate- and methionine-metabolizing enzyme and aberrant CpG island hypermethylation in uterine cervical cancer. *Gynecol Oncol* 96: 173-180

Karpinski P, Myszk A, Ramsey D, Misiak B, Gil J, Laczmanska I, Grzebieniak Z, Sebzda T, Smigiel R, Stembalska A et al (2010) Polymorphisms in methyl-group metabolism genes and risk of sporadic colorectal cancer with relation to the CpG island methylator phenotype. *Cancer Epidemiol* 34: 338-344

Katayama Y, Takahashi M, Kuwayama H (2009) Helicobacter pylori causes runx3 gene methylation and its loss of expression in gastric epithelial cells, which is mediated by nitric oxide produced by macrophages. *Biochem Biophys Res Commun* 388: 496-500

Kato N, Tamura G, Fukase M, Shibuya H, Motoyama T (2003) Hypermethylation of the RUNX3 gene promoter in testicular yolk sac tumor of infants. *Am J Pathol* 163: 387-391

Katoh M (2007) Dysregulation of stem cell signaling network due to germline mutation, SNP, Helicobacter pylori infection, epigenetic change and genetic alteration in gastric cancer. *Cancer Biol Ther* 6: 832-839

Katoh Y, Katoh M (2006) Hedgehog signaling pathway and gastrointestinal stem cell signaling network (review). *Int J Mol Med* 18: 1019-1023

Kawasaki T, Nosho K, Ohnishi M, Suemoto Y, Kirkner GJ, Dehari R, Meyerhardt JA, Fuchs CS, Ogino S (2007) Correlation of beta-catenin localization with cyclooxygenase-2 expression and CpG island methylator phenotype (CIMP) in colorectal cancer. *Neoplasia* 9: 569-577

Kawasaki T, Nosho K, Ohnishi M, Suemoto Y, Kirkner GJ, Fuchs CS, Ogino S (2007) IGFBP3 promoter methylation in colorectal cancer: relationship with microsatellite instability, CpG island methylator phenotype, and p53. *Neoplasia* 9: 1091-1098

Kawasaki T, Ohnishi M, Nosho K, Suemoto Y, Kirkner GJ, Meyerhardt JA, Fuchs CS, Ogino S (2008) CpG island methylator phenotype-low (CIMP-low) colorectal cancer shows not only few methylated CIMP-high-specific CpG islands, but also low-level methylation at individual loci. *Mod Pathol* 21: 245-255

Kawasaki T, Ohnishi M, Suemoto Y, Kirkner GJ, Liu Z, Yamamoto H, Loda M, Fuchs CS, Ogino S (2008) WRN promoter methylation possibly connects mucinous differentiation, microsatellite instability and CpG island methylator phenotype in colorectal cancer. *Mod Pathol* 21: 150-158

Keller G, Vogelsang H, Becker I, Plaschke S, Ott K, Suriano G, Mateus AR, Seruca R, Biedermann K, Huntsman D et al (2004) Germline mutations of the E-cadherin(CDH1) and TP53 genes, rather than of RUNX3 and HPP1, contribute to genetic predisposition in German gastric cancer patients. *J Med Genet* 41: e89

Kim BH, Cho NY, Shin SH, Kwon HJ, Jang JJ, Kang GH (2009) CpG island hypermethylation and repetitive DNA hypomethylation in premalignant lesion of extrahepatic cholangiocarcinoma. *Virchows Arch* 455: 343-351

Kim EJ, Kim YJ, Jeong P, Ha YS, Bae SC, Kim WJ (2008) Methylation of the RUNX3 promoter as a potential prognostic marker for bladder tumor. *J Urol* 180: 1141-1145

Kim HR, Oh BC, Choi JK, Bae SC (2008) Pim-1 kinase phosphorylates and stabilizes RUNX3 and alters its subcellular localization. *J Cell Biochem* 105: 1048-1058

Kim JH, Choi JK, Cinghu S, Jang JW, Lee YS, Li YH, Goh YM, Chi XZ, Lee KS, Wee H et al (2009) Jab1/CSN5 induces the cytoplasmic localization and degradation of RUNX3. *J Cell Biochem* 107: 557-565

Kim JH, Jung EJ, Lee HS, Kim MA, Kim WH (2009) Comparative analysis of DNA methylation between primary and metastatic gastric carcinoma. *Oncol Rep* 21: 1251-1259

Kim TY, Jong HS, Jung Y, Kang GH, Bang YJ (2004) DNA hypermethylation in gastric cancer. *Aliment Pharmacol Ther* 20 Suppl 1: 131-142

Kim TY, Lee HJ, Hwang KS, Lee M, Kim JW, Bang YJ, Kang GH (2004) Methylation of RUNX3 in various types of human cancers and premalignant stages of gastric carcinoma.

Lab Invest 84: 479-484

Kim WJ, Kim EJ, Jeong P, Quan C, Kim J, Li QL, Yang JO, Ito Y, Bae SC (2005) RUNX3 inactivation by point mutations and aberrant DNA methylation in bladder tumors. *Cancer Res* 65: 9347-9354

Kim WJ, Lee JW, Quan C, Youn HJ, Kim HM, Bae SC (2011) Nicotinamide Inhibits Growth of Carcinogen Induced Mouse Bladder Tumor and Human Bladder Tumor Xenograft Through Up-Regulation of RUNX3 and p300. *J Urol* advance online publication 19 April 2011; doi:10.1016/j.juro.2011.02.017

Kitago M, Martinez SR, Nakamura T, Sim MS, Hoon DS (2009) Regulation of RUNX3 tumor suppressor gene expression in cutaneous melanoma. *Clin Cancer Res* 15: 2988-2994

Kitajima Y, Ohtaka K, Mitsuno M, Tanaka M, Sato S, Nakafusa Y, Miyazaki K (2008) *Helicobacter pylori* infection is an independent risk factor for Runx3 methylation in gastric cancer. *Oncol Rep* 19: 197-202

Knapp DW (2008) RUNX3 methylation and the potential to predict the behavior of bladder cancer. *J Urol* 180: 806-807

Kodach LL, Jacobs RJ, Heijmans J, van Noesel CJ, Langers AM, Verspaget HW, Hommes DW, Offerhaus GJ, van den Brink GR, Hardwick JC (2010) The role of EZH2 and DNA methylation in the silencing of the tumour suppressor RUNX3 in colorectal cancer. *Carcinogenesis* 31: 1567-1575

Kohya N, Koga Y, Kitajima Y, Miyazaki K (2006) Aberrant promoter hypermethylation in biliary tract carcinoma. *J Hepatobiliary Pancreat Surg* 13: 296-305

Ku JL, Kang SB, Shin YK, Kang HC, Hong SH, Kim IJ, Shin JH, Han IO, Park JG (2004) Promoter hypermethylation downregulates RUNX3 gene expression in colorectal cancer cell lines. *Oncogene* 23: 6736-6742

Kudo Y, Tsunematsu T, Takata T (2011) Oncogenic role of RUNX3 in head and neck cancer. *J Cell Biochem* 112: 387-393

Kunze E, Wendt M, Schlott T (2006) Promoter hypermethylation of the 14-3-3 sigma, SYK and CAGE-1 genes is related to the various phenotypes of urinary bladder carcinomas and associated with progression of transitional cell carcinomas. *Int J Mol Med* 18: 547-557

Kure S, Nosho K, Baba Y, Irahara N, Shima K, Ng K, Meyerhardt JA, Giovannucci EL, Fuchs CS, Ogino S (2009) Vitamin D receptor expression is associated with PIK3CA and KRAS mutations in colorectal cancer. *Cancer Epidemiol Biomarkers Prev* 18: 2765-2772

Lai KW, Koh KX, Loh M, Tada K, Subramaniam MM, Lim XY, Vaithilingam A, Salto-Tellez M, Iacopetta B, Ito Y et al (2010) MicroRNA-130b regulates the tumour suppressor RUNX3 in gastric cancer. *Eur J Cancer* 46: 1456-1463

Lau QC, Raja E, Salto-Tellez M, Liu Q, Ito K, Inoue M, Putti TC, Loh M, Ko TK, Huang C et al (2006) RUNX3 is frequently inactivated by dual mechanisms of protein mislocalization and promoter hypermethylation in breast cancer. *Cancer Res* 66: 6512-6520



- Lee CW, Ito K, Ito Y (2010) Role of RUNX3 in bone morphogenetic protein signaling in colorectal cancer. *Cancer Res* 70: 4243-4252
- Lee KS, Lee YS, Lee JM, Ito K, Cinghu S, Kim JH, Jang JW, Li YH, Goh YM, Chi XZ et al (2010) Runx3 is required for the differentiation of lung epithelial cells and suppression of lung cancer. *Oncogene* 29: 3349-3361
- Lee S, Cho NY, Yoo EJ, Kim JH, Kang GH (2008) CpG island methylator phenotype in colorectal cancers: comparison of the new and classic CpG island methylator phenotype marker panels. *Arch Pathol Lab Med* 132: 1657-1665
- Lee SH, Kim J, Kim WH, Lee YM (2009) Hypoxic silencing of tumor suppressor RUNX3 by histone modification in gastric cancer cells. *Oncogene* 28: 184-194
- Lefevre M, Gunduz M, Nagatsuka H, Gunduz E, Al Sheikh Ali M, Beder L, Fukushima K, Yamanaka N, Shimizu K, Nagai N (2009) Fine deletion analysis of 1p36 chromosomal region in oral squamous cell carcinomas. *J Oral Pathol Med* 38: 94-98
- Levkovitz L, Yosef N, Gershengorn MC, Ruppin E, Sharan R, Oron Y (2010) A novel HMM-based method for detecting enriched transcription factor binding sites reveals RUNX3 as a potential target in pancreatic cancer biology. *PLoS One* 5: e14423
- Li J, Kleeff J, Guweidhi A, Esposito I, Berberat PO, Giese T, Buchler MW, Friess H (2004) RUNX3 expression in primary and metastatic pancreatic cancer. *J Clin Pathol* 57: 294-299
- Li LY, Li JK, Shen Y, Yu L, Zhang JH (2008) [Promoter methylation and expression of Runx3 gene in gastric cancer]. *Zhonghua Wei Chang Wai Ke Za Zhi* 11: 379-382
- Li QL, Kim HR, Kim WJ, Choi JK, Lee YH, Kim HM, Li LS, Kim H, Chang J, Ito Y et al (2004) Transcriptional silencing of the RUNX3 gene by CpG hypermethylation is associated with lung cancer. *Biochem Biophys Res Commun* 314: 223-228
- Li WQ, Pan KF, Zhang Y, Dong CX, Zhang L, Ma JL, Zhou T, Li JY, You WC (2010) RUNX3 methylation and expression associated with advanced precancerous gastric lesions in a Chinese population. *Carcinogenesis* 32: 406-410
- Li WQ, Pan KF, Zhang Y, Zhang L, Ma JL, Zhou T, Li JY, Wang Z, Su Y, You WC (2009) [Relationship between RUNX3 expression and precancerous gastric lesions in high-risk population]. *Beijing Da Xue Xue Bao* 41: 348-352
- Li X, Zhang Y, Qiao T, Wu K, Ding J, Liu J, Fan D (2008) RUNX3 inhibits growth of HCC cells and HCC xenografts in mice in combination with adriamycin. *Cancer Biol Ther* 7: 669-676
- Licchesi JD, Westra WH, Hooker CM, Machida EO, Baylin SB, Herman JG (2008) Epigenetic alteration of Wnt pathway antagonists in progressive glandular neoplasia of the lung. *Carcinogenesis* 29: 895-904
- Lim B, Ju H, Kim M, Kang C (2011) Increased genetic susceptibility to intestinal-type gastric cancer is associated with increased activity of the RUNX3 distal promoter. *Cancer advance online publication* 26 April 2011; doi: 10.1002/cncr.26161

- Lin DJ, Fan RF, Liu XF (2008) [Significance of DNA methylation status of runx3 gene promoter region in acute leukemia]. *Zhongguo Shi Yan Xue Ye Xue Za Zhi* 16: 263-266
- Lind GE, Skotheim RI, Fraga MF, Abeler VM, Esteller M, Lothe RA (2006) Novel epigenetically deregulated genes in testicular cancer include homeobox genes and SCGB3A1 (HIN-1). *J Pathol* 210: 441-449
- Long C, Yin B, Lu Q, Zhou X, Hu J, Yang Y, Yu F, Yuan Y (2007) Promoter hypermethylation of the RUNX3 gene in esophageal squamous cell carcinoma. *Cancer Invest* 25: 685-690
- Lu YH, Zheng RD, Chen J, Chen BF, Li JG, Lin ZC (2011) [Expression of RUNX3 protein in hepatic cell carcinoma and its clinicopathological implications]. *Nan Fang Yi Ke Da Xue Xue Bao* 31: 329-332
- Lund AH, van Lohuizen M (2002) RUNX: a trilogy of cancer genes. *Cancer Cell* 1: 213-215
- Mabuchi M, Kataoka H, Miura Y, Kim TS, Kawaguchi M, Ebi M, Tanaka M, Mori Y, Kubota E, Mizushima T et al (2010) Tumor suppressor, AT motif binding factor 1 (ATBF1), translocates to the nucleus with runt domain transcription factor 3 (RUNX3) in response to TGF-beta signal transduction. *Biochem Biophys Res Commun* 398: 321-325
- Matsubara D, Niki T, Ishikawa S, Goto A, Ohara E, Yokomizo T, Heizmann CW, Aburatani H, Moriyama S, Moriyama H et al (2005) Differential expression of S100A2 and S100A4 in lung adenocarcinomas: clinicopathological significance, relationship to p53 and identification of their target genes. *Cancer Sci* 96: 844-857
- Matsuo N, Shiraha H, Fujikawa T, Takaoka N, Ueda N, Tanaka S, Nishina S, Nakanishi Y, Uemura M, Takaki A et al (2009) Twist expression promotes migration and invasion in hepatocellular carcinoma. *BMC Cancer* 9: 240
- Merhavi E, Cohen Y, Avraham BC, Frenkel S, Chowers I, Pe'er J, Goldenberg-Cohen N (2007) Promoter methylation status of multiple genes in uveal melanoma. *Invest Ophthalmol Vis Sci* 48: 4403-4406
- Mikata R, Fukai K, Imazeki F, Arai M, Fujiwara K, Yonemitsu Y, Zhang K, Nabeya Y, Ochiai T, Yokosuka O (2010) BCL2L10 is frequently silenced by promoter hypermethylation in gastric cancer. *Oncol Rep* 23: 1701-1708
- Mitsuno M, Kitajima Y, Ide T, Ohtaka K, Tanaka M, Satoh S, Miyazaki K (2007) Aberrant methylation of p16 predicts candidates for 5-fluorouracil-based adjuvant therapy in gastric cancer patients. *J Gastroenterol* 42: 866-873
- Miyagawa K, Sakakura C, Nakashima S, Yoshikawa T, Kin S, Nakase Y, Ito K, Yamagishi H, Ida H, Yazumi S et al (2006) Down-regulation of RUNX1, RUNX3 and CBFbeta in hepatocellular carcinomas in an early stage of hepatocarcinogenesis. *Anticancer Res* 26: 3633-3643
- Miyazono K, Maeda S, Imamura T (2004) Coordinate regulation of cell growth and differentiation by TGF-beta superfamily and Runx proteins. *Oncogene* 23: 4232-4237
- Miyazono K, Suzuki H, Imamura T (2003) Regulation of TGF-beta signaling and its roles in progression of tumors. *Cancer Sci* 94: 230-234

- Mori T, Nomoto S, Koshikawa K, Fujii T, Sakai M, Nishikawa Y, Inoue S, Takeda S, Kaneko T, Nakao A (2005) Decreased expression and frequent allelic inactivation of the RUNX3 gene at 1p36 in human hepatocellular carcinoma. *Liver Int* 25: 380-388
- Moribe T, Iizuka N, Miura T, Kimura N, Tamatsukuri S, Ishitsuka H, Hamamoto Y, Sakamoto K, Tamesa T, Oka M (2009) Methylation of multiple genes as molecular markers for diagnosis of a small, well-differentiated hepatocellular carcinoma. *Int J Cancer* 125: 388-397
- Mueller W, Nutt CL, Ehrich M, Riemenschneider MJ, von Deimling A, van den Boom D, Louis DN (2007) Downregulation of RUNX3 and TES by hypermethylation in glioblastoma. *Oncogene* 26: 583-593
- Muller CI, Luong QT, Shih LY, Jones LC, Desmond JC, Kawamata N, Tcherniantchouk O, Liu Q, Ito K, Osato M et al (2008) Identification of marker genes including RUNX3 (AML2) that discriminate between different myeloproliferative neoplasms and normal individuals. *Leukemia* 22: 1773-1778
- Nagahama Y, Ishimaru M, Osaki M, Inoue T, Maeda A, Nakada C, Moriyama M, Sato K, Oshimura M, Ito H (2008) Apoptotic pathway induced by transduction of RUNX3 in the human gastric carcinoma cell line MKN-1. *Cancer Sci* 99: 23-30
- Nakanishi Y, Shiraha H, Nishina S, Tanaka S, Matsubara M, Horiguchi S, Iwamuro M, Takaoka N, Uemura M, Kuwaki K et al (2011) Loss of runt-related transcription factor 3 expression leads hepatocellular carcinoma cells to escape apoptosis. *BMC Cancer* 11: 3
- Nakase Y, Sakakura C, Miyagawa K, Kin S, Fukuda K, Yanagisawa A, Koide K, Morofuji N, Hosokawa Y, Shimomura K et al (2005) Frequent loss of RUNX3 gene expression in remnant stomach cancer and adjacent mucosa with special reference to topography. *Br J Cancer* 92: 562-569
- Nevadunsky NS, Barbieri JS, Kwong J, Merritt MA, Welch WR, Berkowitz RS, Mok SC (2009) RUNX3 protein is overexpressed in human epithelial ovarian cancer. *Gynecol Oncol* 112: 325-330
- Nishida N, Nagasaka T, Nishimura T, Ikai I, Boland CR, Goel A (2008) Aberrant methylation of multiple tumor suppressor genes in aging liver, chronic hepatitis, and hepatocellular carcinoma. *Hepatology* 47: 908-918
- Nishio M, Sakakura C, Nagata T, Komiyama S, Miyashita A, Hamada T, Kuryu Y, Ikoma H, Kubota T, Kimura A et al (2010) RUNX3 promoter methylation in colorectal cancer: its relationship with microsatellite instability and its suitability as a novel serum tumor marker. *Anticancer Res* 30: 2673-2682
- Nomoto S, Kinoshita T, Kato K, Otani S, Kasuya H, Takeda S, Kanazumi N, Sugimoto H, Nakao A (2007) Hypermethylation of multiple genes as clonal markers in multicentric hepatocellular carcinoma. *Br J Cancer* 97: 1260-1265
- Nomoto S, Kinoshita T, Mori T, Kato K, Sugimoto H, Kanazumi N, Takeda S, Nakao A (2008) Adverse prognosis of epigenetic inactivation in RUNX3 gene at 1p36 in human pancreatic cancer. *Br J Cancer* 98: 1690-1695
- Nosho K, Irahara N, Shima K, Kure S, Kirkner GJ, Schernhammer ES, Hazra A, Hunter DJ,

- Quackenbush J, Spiegelman D et al (2008) Comprehensive biostatistical analysis of CpG island methylator phenotype in colorectal cancer using a large population-based sample. *PLoS One* 3: e3698
- Nosho K, Kawasaki T, Chan AT, Ohnishi M, Suemoto Y, Kirkner GJ, Fuchs CS, Ogino S (2008) Cyclin D1 is frequently overexpressed in microsatellite unstable colorectal cancer, independent of CpG island methylator phenotype. *Histopathology* 53: 588-598
- Nosho K, Kawasaki T, Ohnishi M, Suemoto Y, Kirkner GJ, Zepf D, Yan L, Longtine JA, Fuchs CS, Ogino S (2008) PIK3CA mutation in colorectal cancer: relationship with genetic and epigenetic alterations. *Neoplasia* 10: 534-541
- Nosho K, Kure S, Irahara N, Shima K, Baba Y, Spiegelman D, Meyerhardt JA, Giovannucci EL, Fuchs CS, Ogino S (2009) A prospective cohort study shows unique epigenetic, genetic, and prognostic features of synchronous colorectal cancers. *Gastroenterology* 137: 1609-1620 e1601-1603
- Nosho K, Shima K, Irahara N, Kure S, Baba Y, Kirkner GJ, Chen L, Gokhale S, Hazra A, Spiegelman D et al (2009) DNMT3B expression might contribute to CpG island methylator phenotype in colorectal cancer. *Clin Cancer Res* 15: 3663-3671
- Nosho K, Shima K, Irahara N, Kure S, Firestein R, Baba Y, Toyoda S, Chen L, Hazra A, Giovannucci EL et al (2009) SIRT1 histone deacetylase expression is associated with microsatellite instability and CpG island methylator phenotype in colorectal cancer. *Mod Pathol* 22: 922-932
- Nosho K, Shima K, Kure S, Irahara N, Baba Y, Chen L, Kirkner GJ, Fuchs CS, Ogino S (2009) JC virus T-antigen in colorectal cancer is associated with p53 expression and chromosomal instability, independent of CpG island methylator phenotype. *Neoplasia* 11: 87-95
- Ogasawara N, Tsukamoto T, Mizoshita T, Inada KI, Ban H, Kondo S, Takasu S, Ushijima T, Ito K, Ito Y et al (2009) RUNX3 expression correlates with chief cell differentiation in human gastric cancers. *Histol Histopathol* 24: 31-40
- Ogino S, Hazra A, Tranah GJ, Kirkner GJ, Kawasaki T, Nosho K, Ohnishi M, Suemoto Y, Meyerhardt JA, Hunter DJ et al (2007) MGMT germline polymorphism is associated with somatic MGMT promoter methylation and gene silencing in colorectal cancer. *Carcinogenesis* 28: 1985-1990
- Ogino S, Kawasaki T, Kirkner GJ, Kraft P, Loda M, Fuchs CS (2007) Evaluation of markers for CpG island methylator phenotype (CIMP) in colorectal cancer by a large population-based sample. *J Mol Diagn* 9: 305-314
- Ogino S, Kawasaki T, Kirkner GJ, Ohnishi M, Fuchs CS (2007) 18q loss of heterozygosity in microsatellite stable colorectal cancer is correlated with CpG island methylator phenotype-negative (CIMP-0) and inversely with CIMP-low and CIMP-high. *BMC Cancer* 7: 72
- Ogino S, Kawasaki T, Kirkner GJ, Suemoto Y, Meyerhardt JA, Fuchs CS (2007) Molecular correlates with MGMT promoter methylation and silencing support CpG island methylator phenotype-low (CIMP-low) in colorectal cancer. *Gut* 56: 1564-1571

- Ogino S, Kawasaki T, Nosho K, Ohnishi M, Suemoto Y, Kirkner GJ, Fuchs CS (2008) LINE-1 hypomethylation is inversely associated with microsatellite instability and CpG island methylator phenotype in colorectal cancer. *Int J Cancer* 122: 2767-2773
- Ogino S, Kawasaki T, Ogawa A, Kirkner GJ, Loda M, Fuchs CS (2007) Fatty acid synthase overexpression in colorectal cancer is associated with microsatellite instability, independent of CpG island methylator phenotype. *Hum Pathol* 38: 842-849
- Ogino S, Kawasaki T, Ogawa A, Kirkner GJ, Loda M, Fuchs CS (2007) TGFBR2 mutation is correlated with CpG island methylator phenotype in microsatellite instability-high colorectal cancer. *Hum Pathol* 38: 614-620
- Ogino S, Kawasaki T, Ogawa A, Kirkner GJ, Loda M, Fuchs CS (2007) Cytoplasmic localization of p27 (cyclin-dependent kinase inhibitor 1B/KIP1) in colorectal cancer: inverse correlations with nuclear p27 loss, microsatellite instability, and CpG island methylator phenotype. *Hum Pathol* 38: 585-592
- Ogino S, Meyerhardt JA, Kawasaki T, Clark JW, Ryan DP, Kulke MH, Enzinger PC, Wolpin BM, Loda M, Fuchs CS (2007) CpG island methylation, response to combination chemotherapy, and patient survival in advanced microsatellite stable colorectal carcinoma. *Virchows Arch* 450: 529-537
- Ogino S, Nosho K, Irahara N, Meyerhardt JA, Baba Y, Shima K, Glickman JN, Ferrone CR, Mino-Kenudson M, Tanaka N et al (2009) Lymphocytic reaction to colorectal cancer is associated with longer survival, independent of lymph node count, microsatellite instability, and CpG island methylator phenotype. *Clin Cancer Res* 15: 6412-6420
- Ogino S, Nosho K, Kirkner GJ, Kawasaki T, Meyerhardt JA, Loda M, Giovannucci EL, Fuchs CS (2009) CpG island methylator phenotype, microsatellite instability, BRAF mutation and clinical outcome in colon cancer. *Gut* 58: 90-96
- Osaki M, Moriyama M, Adachi K, Nakada C, Takeda A, Inoue Y, Adachi H, Sato K, Oshimura M, Ito H (2004) Expression of RUNX3 protein in human gastric mucosa, intestinal metaplasia and carcinoma. *Eur J Clin Invest* 34: 605-612
- Oshimo Y, Oue N, Mitani Y, Nakayama H, Kitadai Y, Yoshida K, Ito Y, Chayama K, Yasui W (2004) Frequent loss of RUNX3 expression by promoter hypermethylation in gastric carcinoma. *Pathobiology* 71: 137-143
- Pande S, Ali SA, Dowdy C, Zaidi SK, Ito K, Ito Y, Montecino MA, Lian JB, Stein JL, van Wijnen AJ et al (2009) Subnuclear targeting of the Runx3 tumor suppressor and its epigenetic association with mitotic chromosomes. *J Cell Physiol* 218: 473-479
- Park SY, Kwon HJ, Lee HE, Ryu HS, Kim SW, Kim JH, Kim IA, Jung N, Cho NY, Kang GH (2010) Promoter CpG island hypermethylation during breast cancer progression. *Virchows Arch* 458: 73-84
- Park WS, Cho YG, Kim CJ, Song JH, Lee YS, Kim SY, Nam SW, Lee SH, Yoo NJ, Lee JY (2005) Hypermethylation of the RUNX3 gene in hepatocellular carcinoma. *Exp Mol Med* 37: 276-281

- Peng Z, Tang H, Wang X, Zhou C, Fan J, Wang L, Jia Z, Li Q, Le X, Wei D et al (2008) Inhibition of the growth and metastasis of human colon cancer by restoration of RUNX3 expression in cancer cells. *Int J Oncol* 33: 979-984
- Peng Z, Wei D, Wang L, Tang H, Zhang J, Le X, Jia Z, Li Q, Xie K (2006) RUNX3 inhibits the expression of vascular endothelial growth factor and reduces the angiogenesis, growth, and metastasis of human gastric cancer. *Clin Cancer Res* 12: 6386-6394
- Richiardi L, Fiano V, Vizzini L, De Marco L, Delsedime L, Akre O, Tos AG, Merletti F (2009) Promoter methylation in APC, RUNX3, and GSTP1 and mortality in prostate cancer patients. *J Clin Oncol* 27: 3161-3168
- Ripperger T, von Neuhoff N, Kamphues K, Emura M, Lehmann U, Tauscher M, Schraders M, Groenen P, Skawran B, Rudolph C et al (2007) Promoter methylation of PARG1, a novel candidate tumor suppressor gene in mantle-cell lymphomas. *Haematologica* 92: 460-468
- Saeki N, Kim DH, Usui T, Aoyagi K, Tatsuta T, Aoki K, Yanagihara K, Tamura M, Mizushima H, Sakamoto H et al (2007) GASDERMIN, suppressed frequently in gastric cancer, is a target of LMO1 in TGF-beta-dependent apoptotic signalling. *Oncogene* 26: 6488-6498
- Sakakura C, Hagiwara A, Miyagawa K, Nakashima S, Yoshikawa T, Kin S, Nakase Y, Ito K, Yamagishi H, Yazumi S et al (2005) Frequent downregulation of the runt domain transcription factors RUNX1, RUNX3 and their cofactor CBFβ in gastric cancer. *Int J Cancer* 113: 221-228
- Sakakura C, Hamada T, Miyagawa K, Nishio M, Miyashita A, Nagata H, Ida H, Yazumi S, Otsuji E, Chiba T et al (2009) Quantitative analysis of tumor-derived methylated RUNX3 sequences in the serum of gastric cancer patients. *Anticancer Res* 29: 2619-2625
- Sakakura C, Hasegawa K, Miyagawa K, Nakashima S, Yoshikawa T, Kin S, Nakase Y, Yazumi S, Yamagishi H, Okanoue T et al (2005) Possible involvement of RUNX3 silencing in the peritoneal metastases of gastric cancers. *Clin Cancer Res* 11: 6479-6488
- Sakakura C, Miyagawa K, Fukuda KI, Nakashima S, Yoshikawa T, Kin S, Nakase Y, Ida H, Yazumi S, Yamagishi H et al (2007) Frequent silencing of RUNX3 in esophageal squamous cell carcinomas is associated with radioresistance and poor prognosis. *Oncogene* 26: 5927-5938
- Salto-Tellez M, Peh BK, Ito K, Tan SH, Chong PY, Han HC, Tada K, Ong WY, Soong R, Voon DC et al (2006) RUNX3 protein is overexpressed in human basal cell carcinomas. *Oncogene* 25: 7646-7649
- Sasahira T, Kurihara M, Yamamoto K, Bhawal UK, Kirita T, Kuniyasu H (2010) Downregulation of runt-related transcription factor 3 associated with poor prognosis of adenoid cystic and mucoepidermoid carcinomas of the salivary gland. *Cancer Sci* 102: 492-497
- Sato K, Tomizawa Y, Iijima H, Saito R, Ishizuka T, Nakajima T, Mori M (2006) Epigenetic inactivation of the RUNX3 gene in lung cancer. *Oncol Rep* 15: 129-135
- Schulmann K, Sterian A, Berki A, Yin J, Sato F, Xu Y, Olaru A, Wang S, Mori Y, Deacu E et al (2005) Inactivation of p16, RUNX3, and HPP1 occurs early in Barrett's-associated

neoplastic progression and predicts progression risk. *Oncogene* 24: 4138-4148

Shima K, Morikawa T, Baba Y, Nosho K, Suzuki M, Yamauchi M, Hayashi M, Giovannucci E, Fuchs CS, Ogino S (2011) MGMT promoter methylation, loss of expression and prognosis in 855 colorectal cancers. *Cancer Causes Control* 22: 301-309

Shima K, Nosho K, Baba Y, Cantor M, Meyerhardt JA, Giovannucci EL, Fuchs CS, Ogino S (2010) Prognostic significance of CDKN2A (p16) promoter methylation and loss of expression in 902 colorectal cancers: Cohort study and literature review. *Int J Cancer* 9: 125

Shio S, Kodama Y, Ida H, Shiokawa M, Kitamura K, Hatano E, Uemoto S, Chiba T (2011) Loss of RUNX3 expression by histone deacetylation is associated with biliary tract carcinogenesis. *Cancer Sci* 102: 776-783

Shiraha H, Nishina SI, Yamamoto K (2011) Loss of runt-related transcription factor 3 causes development and progression of hepatocellular carcinoma. *J Cell Biochem* 112: 745-749

Slattery ML, Lundgreen A, Herrick JS, Wolff RK, Caan BJ (2011) Genetic variation in the transforming growth factor-beta signaling pathway and survival after diagnosis with colon and rectal cancer. *Cancer advance online publication* 1 March 2011; doi: 10.1002/ncr.26018

Slattery ML, Lundgreen A, Herrick SJ, Caan BJ, Potter JD, Wolff RK (2010) Associations between genetic variation in RUNX1, RUNX2, RUNX3, MAPK1, and eIF4E and risk of colon and rectal cancer: Additional support for a TGF- $\beta$  signaling pathway. *Carcinogenesis* 32: 318-326

Smith E, De Young NJ, Pavey SJ, Hayward NK, Nancarrow DJ, Whiteman DC, Smithers BM, Ruskiewicz AR, Clouston AD, Gotley DC et al (2008) Similarity of aberrant DNA methylation in Barrett's esophagus and esophageal adenocarcinoma. *Mol Cancer* 7: 75

So K, Tamura G, Honda T, Homma N, Endoh M, Togawa N, Nishizuka S, Motoyama T (2006) Quantitative assessment of RUNX3 methylation in neoplastic and non-neoplastic gastric epithelia using a DNA microarray. *Pathol Int* 56: 571-575

So K, Tamura G, Honda T, Homma N, Waki T, Togawa N, Nishizuka S, Motoyama T (2006) Multiple tumor suppressor genes are increasingly methylated with age in non-neoplastic gastric epithelia. *Cancer Sci* 97: 1155-1158

Soong R, Shah N, Peh BK, Chong PY, Ng SS, Zeps N, Joseph D, Salto-Tellez M, Iacopetta B, Ito Y (2009) The expression of RUNX3 in colorectal cancer is associated with disease stage and patient outcome. *Br J Cancer* 100: 676-679

Stein GS, Lian JB, Stein JL, van Wijnen AJ, Montecino M, Pratap J, Choi J, Zaidi SK, Javed A, Gutierrez S et al (2003) Intranuclear organization of RUNX transcriptional regulatory machinery in biological control of skeletogenesis and cancer. *Blood Cells Mol Dis* 30: 170-176

Subramaniam MM, Chan JY, Omar MF, Ito K, Ito Y, Yeoh KG, Salto-Tellez M, Putti TC (2010) Lack of RUNX3 inactivation in columnar cell lesions of breast. *Histopathology* 57: 555-563

Subramaniam MM, Chan JY, Soong R, Ito K, Ito Y, Yeoh KG, Salto-Tellez M, Putti TC (2009) RUNX3 inactivation by frequent promoter hypermethylation and protein

mislocalization constitute an early event in breast cancer progression. *Breast Cancer Res Treat* 113: 113-121

Subramaniam MM, Chan JY, Soong R, Ito K, Yeoh KG, Wong R, Guenther T, Will O, Chen CL, Kumarasinghe MP et al (2009) RUNX3 inactivation in colorectal polyps arising through different pathways of colonic carcinogenesis. *Am J Gastroenterol* 104: 426-436

Subramaniam MM, Chan JY, Yeoh KG, Quek T, Ito K, Salto-Tellez M (2009) Molecular pathology of RUNX3 in human carcinogenesis. *Biochim Biophys Acta* 1796: 315-331

Sugai T, Habano W, Endoh M, Konishi Y, Akasaka R, Toyota M, Yamano H, Koeda K, Wakabayashi G, Suzuki K (2010) Molecular analysis of gastric differentiated-type intramucosal and submucosal cancers. *Int J Cancer* 127: 2500-2509

Sugiura H, Ishiguro H, Kuwabara Y, Kimura M, Mitsui A, Mori Y, Ogawa R, Katada T, Harata K, Fujii Y (2008) Decreased expression of RUNX3 is correlated with tumor progression and poor prognosis in patients with esophageal squamous cell carcinoma. *Oncol Rep* 19: 713-719

Suzuki M, Shigematsu H, Shames DS, Sunaga N, Takahashi T, Shivapurkar N, Iizasa T, Frenkel EP, Minna JD, Fujisawa T et al (2005) DNA methylation-associated inactivation of TGFbeta-related genes DRM/Gremlin, RUNX3, and HPP1 in human cancers. *Br J Cancer* 93: 1029-1037

Takahashi T, Shivapurkar N, Riquelme E, Shigematsu H, Reddy J, Suzuki M, Miyajima K, Zhou X, Bekele BN, Gazdar AF et al (2004) Aberrant promoter hypermethylation of multiple genes in gallbladder carcinoma and chronic cholecystitis. *Clin Cancer Res* 10: 6126-6133

Tamura G (2004) Promoter methylation status of tumor suppressor and tumor-related genes in neoplastic and non-neoplastic gastric epithelia. *Histol Histopathol* 19: 221-228

Tamura G (2006) Alterations of tumor suppressor and tumor-related genes in the development and progression of gastric cancer. *World J Gastroenterol* 12: 192-198

Tamura G, So K, Miyoshi H, Honda T, Nishizuka S, Motoyama T (2009) Quantitative assessment of gene methylation in neoplastic and non-neoplastic gastric epithelia using methylation-specific DNA microarray. *Pathol Int* 59: 895-899

Tan SH, Ida H, Goh BC, Hsieh W, Loh M, Ito Y (2006) Analyses of promoter hypermethylation for RUNX3 and other tumor suppressor genes in nasopharyngeal carcinoma. *Anticancer Res* 26: 4287-4292

Tan SH, Ida H, Lau QC, Goh BC, Chieng WS, Loh M, Ito Y (2007) Detection of promoter hypermethylation in serum samples of cancer patients by methylation-specific polymerase chain reaction for tumour suppressor genes including RUNX3. *Oncol Rep* 18: 1225-1230

Tan Z, Ling ZQ, Chen C, Xu JJ, Ge MH (2010) [Evolution pattern of the Runx3 gene 5'-CpG island methylation in human salivary gland adenoid cystic carcinoma]. *Zhonghua Zhong Liu Za Zhi* 32: 907-912

Tanaka N, Huttenhower C, Nosho K, Baba Y, Shima K, Quackenbush J, Haigis KM, Giovannucci E, Fuchs CS, Ogino S (2010) Novel application of structural equation modeling



- to correlation structure analysis of CpG island methylation in colorectal cancer. *Am J Pathol* 177: 2731-2740
- Tang J, Bai W, Ji W, Gao H, Liu J (2010) [Relationship between hypermethylation of Runx3 gene and the development and metastasis of laryngeal carcinoma]. *Lin Chung Er Bi Yan Hou Tou Jing Wai Ke Za Zhi* 24: 834-837
- Tanji Y, Osaki M, Nagahama Y, Kodani I, Ryoke K, Ito H (2007) Runt-related transcription factor 3 expression in human oral squamous cell carcinomas; implication for tumor progression and prognosis. *Oral Oncol* 43: 88-94
- Tokuyama Y, Takahashi T, Okumura N, Nonaka K, Kawaguchi Y, Yamaguchi K, Osada S, Gazdar A, Yoshida K Aberrant methylation of heparan sulfate glucosamine 3-O-sulfotransferase 2 genes as a biomarker in colorectal cancer. *Anticancer Res* 30: 4811-4818
- Tong DD, Jiang Y, Li M, Kong D, Meng XN, Zhao YZ, Jin Y, Bai J, Fu SB, Geng JS (2009) RUNX3 inhibits cell proliferation and induces apoptosis by TGF-beta-dependent and -independent mechanisms in human colon carcinoma cells. *Pathobiology* 76: 163-169
- Tonomoto Y, Tachibana M, Dhar DK, Onoda T, Hata K, Ohnuma H, Tanaka T, Nagasue N (2007) Differential expression of RUNX genes in human esophageal squamous cell carcinoma: downregulation of RUNX3 worsens patient prognosis. *Oncology* 73: 346-356
- Torquati A, O'Rear L, Longobardi L, Spagnoli A, Richards WO, Daniel Beauchamp R (2004) RUNX3 inhibits cell proliferation and induces apoptosis by reinstating transforming growth factor beta responsiveness in esophageal adenocarcinoma cells. *Surgery* 136: 310-316
- Tozawa T, Tamura G, Honda T, Nawata S, Kimura W, Makino N, Kawata S, Sugai T, Suto T, Motoyama T (2004) Promoter hypermethylation of DAP-kinase is associated with poor survival in primary biliary tract carcinoma patients. *Cancer Sci* 95: 736-740
- Tsang YH, Lamb A, Chen LF (2011) New insights into the inactivation of gastric tumor suppressor RUNX3: the role of *H. pylori* infection. *J Cell Biochem* 112: 381-386
- Tsang YH, Lamb A, Romero-Gallo J, Huang B, Ito K, Peek RM, Jr., Ito Y, Chen LF (2010) *Helicobacter pylori* CagA targets gastric tumor suppressor RUNX3 for proteasome-mediated degradation. *Oncogene* 29: 5643-5650
- Tsuji S, Tsujii M, Murata H, Nishida T, Komori M, Yasumaru M, Ishii S, Sasayama Y, Kawano S, Hayashi N (2006) *Helicobacter pylori* eradication to prevent gastric cancer: underlying molecular and cellular mechanisms. *World J Gastroenterol* 12: 1671-1680
- Tsukamoto T, Mizoshita T, Tatematsu M (2006) Gastric-and-intestinal mixed-type intestinal metaplasia: aberrant expression of transcription factors and stem cell intestinalization. *Gastric Cancer* 9: 156-166
- Tsukamoto T, Yokoi T, Maruta S, Kitamura M, Yamamoto T, Ban H, Tatematsu M (2007) Gastric adenocarcinoma with chief cell differentiation. *Pathol Int* 57: 517-522
- Tsunematsu T, Kudo Y, Iizuka S, Ogawa I, Fujita T, Kurihara H, Abiko Y, Takata T (2009) RUNX3 has an oncogenic role in head and neck cancer. *PLoS One* 4: e5892
- Ueda N, Shiraha H, Fujikawa T, Takaoka N, Nakanishi Y, Suzuki M, Matsuo N, Tanaka S, Nishina S, Uemura M et al (2008) Exon 2 deletion splice variant of gamma-glutamyl

carboxylase causes des-gamma-carboxy prothrombin production in hepatocellular carcinoma cell lines. *Mol Oncol* 2: 241-249

Uhm KO, Lee ES, Lee YM, Park JS, Kim SJ, Kim BS, Kim HS, Park SH (2009) Differential methylation pattern of ID4, SFRP1, and SHP1 between acute myeloid leukemia and chronic myeloid leukemia. *J Korean Med Sci* 24: 493-497

Usui T, Aoyagi K, Saeki N, Nakanishi Y, Kanai Y, Ohki M, Ogawa K, Yoshida T, Sasaki H (2006) Expression status of RUNX1/AML1 in normal gastric epithelium and its mutational analysis in microdissected gastric cancer cells. *Int J Oncol* 29: 779-784

Vogiatzi P, De Falco G, Claudio PP, Giordano A (2006) How does the human RUNX3 gene induce apoptosis in gastric cancer? Latest data, reflections and reactions. *Cancer Biol Ther* 5: 371-374

Wada M, Yazumi S, Takaishi S, Hasegawa K, Sawada M, Tanaka H, Ida H, Sakakura C, Ito K, Ito Y et al (2004) Frequent loss of RUNX3 gene expression in human bile duct and pancreatic cancer cell lines. *Oncogene* 23: 2401-2407

Wakatsuki K, Yamada Y, Narikiyo M, Ueno M, Takayama T, Tamaki H, Miki K, Matsumoto S, Enomoto K, Yokotani T et al (2008) Clinicopathological and prognostic significance of mucin phenotype in gastric cancer. *J Surg Oncol* 98: 124-129

Waki T, Tamura G, Sato M, Terashima M, Nishizuka S, Motoyama T (2003) Promoter methylation status of DAP-kinase and RUNX3 genes in neoplastic and non-neoplastic gastric epithelia. *Cancer Sci* 94: 360-364

Watanabe T, Kobunai T, Ikeuchi H, Yamamoto Y, Matsuda K, Ishihara S, Nozawa K, Iinuma H, Kanazawa T, Tanaka T et al (2011) RUNX3 copy number predicts the development of UC-associated colorectal cancer. *Int J Oncol* 38: 201-207

Wei D, Gong W, Oh SC, Li Q, Kim WD, Wang L, Le X, Yao J, Wu TT, Huang S et al (2005) Loss of RUNX3 expression significantly affects the clinical outcome of gastric cancer patients and its restoration causes drastic suppression of tumor growth and metastasis. *Cancer Res* 65: 4809-4816

Weisenberger DJ, Trinh BN, Campan M, Sharma S, Long TI, Ananthnarayan S, Liang G, Esteva FJ, Hortobagyi GN, McCormick F et al (2008) DNA methylation analysis by digital bisulfite genomic sequencing and digital MethyLight. *Nucleic Acids Res* 36: 4689-4698

Wolff EM, Liang G, Cortez CC, Tsai YC, Castela JE, Cortessis VK, Tsao-Wei DD, Groshen S, Jones PA (2008) RUNX3 methylation reveals that bladder tumors are older in patients with a history of smoking. *Cancer Res* 68: 6208-6214

Wong JE, Ito Y, Correa P, Peeters KC, van de Velde CJ, Sasako M, Macdonald J (2003) Therapeutic strategies in gastric cancer. *J Clin Oncol* 21: 267s-269s

Worthley DL, Whitehall VL, Buttenshaw RL, Irahara N, Greco SA, Ramsnes I, Mallitt KA, Le Leu RK, Winter J, Hu Y et al (2010) DNA methylation within the normal colorectal mucosa is associated with pathway-specific predisposition to cancer. *Oncogene* 29: 1653-1662

Wu BW, Zhang J, Fei XF, Zhu ZG, Cao WX (2007) [Reappraisal of the impacts of human

Runt-related transcription factor gene 3 expression on differentiation and prognosis of gastric cancer]. *Zhonghua Wei Chang Wai Ke Za Zhi* 10: 165-168

Wu D, Tian Y, Gong W, Zhu H, Zhang Z, Wang M, Wang S, Tan M, Wu H (2009) Genetic variants in the Runt-related transcription factor 3 gene contribute to gastric cancer risk in a Chinese population. *Cancer Sci* 100: 1688-1694

Wu K, Nie Y, Guo C, Chen Y, Ding J, Fan D (2009) Molecular basis of therapeutic approaches to gastric cancer. *J Gastroenterol Hepatol* 24: 37-41

Xiao WH, Liu WW (2004) [Improvement and application of methylation-specific polymerase chain reaction.]. *Ai Zheng* 23: 1354-1356

Xiao WH, Liu WW (2004) [Analysis of methylation and loss of heterozygosity of RUNX3 gene in hepatocellular carcinoma and its clinical significance]. *Zhonghua Gan Zang Bing Za Zhi* 12: 227-230

Xiao WH, Liu WW (2004) Hemizygous deletion and hypermethylation of RUNX3 gene in hepatocellular carcinoma. *World J Gastroenterol* 10: 376-380

Yamada C, Ozaki T, Ando K, Suenaga Y, Inoue K, Ito Y, Okoshi R, Kageyama H, Kimura H, Miyazaki M et al (2010) RUNX3 modulates DNA damage-mediated phosphorylation of tumor suppressor p53 at Ser-15 and acts as a co-activator for p53. *J Biol Chem* 285: 16693-16703

Yamamura Y, Lee WL, Inoue K, Ida H, Ito Y (2006) RUNX3 cooperates with FoxO3a to induce apoptosis in gastric cancer cells. *J Biol Chem* 281: 5267-5276

Yanada M, Yaoi T, Shimada J, Sakakura C, Nishimura M, Ito K, Terauchi K, Nishiyama K, Itoh K, Fushiki S (2005) Frequent hemizygous deletion at 1p36 and hypermethylation downregulate RUNX3 expression in human lung cancer cell lines. *Oncol Rep* 14: 817-822

Yanagawa N, Osakabe M, Hayashi M, Tamura G, Motoyama T (2008) Detection of HPV-DNA, p53 alterations, and methylation in penile squamous cell carcinoma in Japanese men. *Pathol Int* 58: 477-482

Yanagawa N, Osakabe M, Hayashi M, Tamura G, Motoyama T (2008) Frequent epigenetic silencing of the FHIT gene in penile squamous cell carcinomas. *Virchows Arch* 452: 377-382

Yanagawa N, Tamura G, Oizumi H, Endoh M, Sadahiro M, Motoyama T (2011) Inverse Correlation between EGFR Mutation and FHIT, RASSF1A and RUNX3 Methylation in Lung Adenocarcinoma: Relation with Smoking Status. *Anticancer Res* 31: 1211-1214

Yanagawa N, Tamura G, Oizumi H, Kanauchi N, Endoh M, Sadahiro M, Motoyama T (2007) Promoter hypermethylation of RASSF1A and RUNX3 genes as an independent prognostic prediction marker in surgically resected non-small cell lung cancers. *Lung Cancer* 58: 131-138

Yanagawa N, Tamura G, Oizumi H, Takahashi N, Shimazaki Y, Motoyama T (2003) Promoter hypermethylation of tumor suppressor and tumor-related genes in non-small cell lung cancers. *Cancer Sci* 94: 589-592

Yang N, Li Z (2008) [5-aza-2'-deoxycytidine induces changes of histone H3-lysine 9 methylation in bladder tumor cells]. *Zhonghua Yi Xue Za Zhi* 88: 2295-2298

- Yano T, Ito K, Fukamachi H, Chi XZ, Wee HJ, Inoue K, Ida H, Bouillet P, Strasser A, Bae SC et al (2006) The RUNX3 tumor suppressor upregulates Bim in gastric epithelial cells undergoing transforming growth factor beta-induced apoptosis. *Mol Cell Biol* 26: 4474-4488
- Yasui W, Nishikawa S, Tahara E (2007) Cancer stem cells. *Cancer Sci* 98: 753-756
- Yoshino M, Suzuki M, Tian L, Moriya Y, Hoshino H, Okamoto T, Yoshida S, Shibuya K, Yoshino I (2009) Promoter hypermethylation of the p16 and Wif-1 genes as an independent prognostic marker in stage IA non-small cell lung cancers. *Int J Oncol* 35: 1201-1209
- Yoshizaki T, Enomoto T, Fujita M, Ueda Y, Miyatake T, Fujiwara K, Miyake T, Kimura T, Yoshino K (2008) Frequent inactivation of RUNX3 in endometrial carcinoma. *Gynecol Oncol* 110: 439-444
- Yu J, Zhu T, Wang Z, Zhang H, Qian Z, Xu H, Gao B, Wang W, Gu L, Meng J et al (2007) A novel set of DNA methylation markers in urine sediments for sensitive/specific detection of bladder cancer. *Clin Cancer Res* 13: 7296-7304
- Zavros Y, Eaton KA, Kang W, Rathinavelu S, Katukuri V, Kao JY, Samuelson LC, Merchant JL (2005) Chronic gastritis in the hypochlorhydric gastrin-deficient mouse progresses to adenocarcinoma. *Oncogene* 24: 2354-2366
- Zhang HY, Rumilla KM, Jin L, Nakamura N, Stilling GA, Ruebel KH, Hobday TJ, Erlichman C, Erickson LA, Lloyd RV (2006) Association of DNA methylation and epigenetic inactivation of RASSF1A and beta-catenin with metastasis in small bowel carcinoid tumors. *Endocrine* 30: 299-306
- Zhang S, Wei L, Zhang A, Zhang L, Yu H (2009) RUNX3 gene methylation in epithelial ovarian cancer tissues and ovarian cancer cell lines. *OMICS* 13: 307-311
- Zhang Y, Wang R, Song H, Huang G, Yi J, Zheng Y, Wang J, Chen L (2011) Methylation of multiple genes as a candidate biomarker in non-small cell lung cancer. *Cancer Lett* 303: 21-28
- Zhang Z, Chen G, Cheng Y, Martinka M, Li G (2010) Prognostic significance of RUNX3 expression in human melanoma. *Cancer advance online publication* 23 December 2010; doi: 10.1002/cncr.25838
- Zhang Z, Wang S, Wang M, Tong N, Fu G (2008) Genetic variants in RUNX3 and risk of bladder cancer: a haplotype-based analysis. *Carcinogenesis* 29: 1973-1978
- Zou XP, Zhang B, Zhang XQ, Chen M, Cao J, Liu WJ (2009) Promoter hypermethylation of multiple genes in early gastric adenocarcinoma and precancerous lesions. *Hum Pathol* 40: 1534-1542
